# Supplementary material
Source: Frontiers journal article supplement (https://www.frontiersin.org/articles/525574)
Supplement: Data_Sheet_5.PDF [file Data_Sheet_5.PDF]

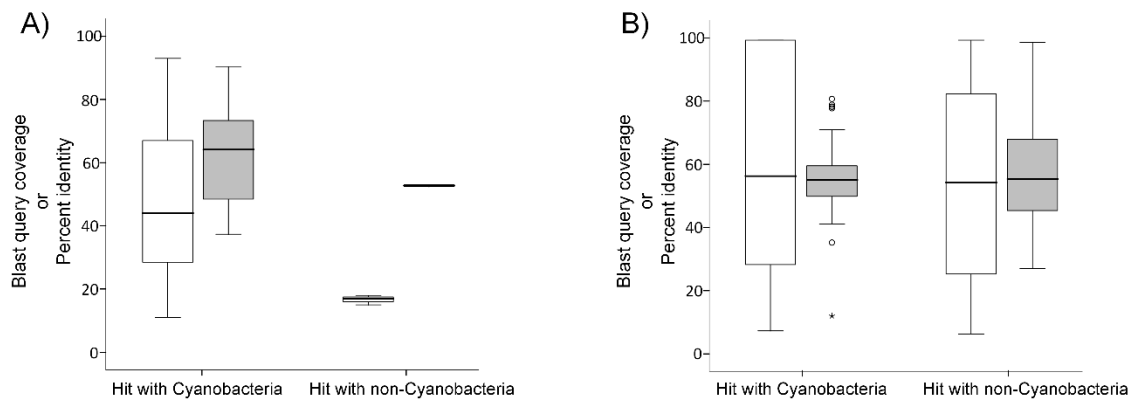

**FIGURE S5** - Percentage of the query coverage (white) and identity (grey) of the 20 first hits obtained in the BLASTx analysis using each one of the eleven (A) and twenty-seven (B) contigs obtained in the two genome binning approaches performed.
